# Supplementary material
Source: MDPI journal article supplement (https://www.mdpi.com/2071-1050/14/6/3577)
Supplement: s1 [file s1]

Archive with 3 entries (3 files):
- Supplementary S1_screenshots.pdf
- Supplementary S2_questionnaire.pdf
- Supplementary S3_theory.pdf
