# Supplementary material
Source: MDPI journal article supplement (https://www.mdpi.com/2071-1050/14/6/3577)
Supplement: s1 [file s1 › Supplementary S2_questionnaire.pdf]

# Supplementary 2 - Questionnaire

We are pleased to invite you and your organisation to participate in our survey. Participation in the survey is voluntary and you may decide to respond to the entire questionnaire or only to some questions. You may at any time withdraw your consent to participate. You do not have to give any reasons for withdrawing. If you withdraw your consent, all information about you and your organisation will be deleted. The information collected in this survey will be treated in an anonymous and aggregated manner and used for statistical and research purposes, in accordance to national laws on privacy and data collecting.

**1. Personal Code:** \_\_\_\_\_

**2. Sex**

- ☐ Male
- ☐ Female
- ☐ Other
- ☐ Do not wish to answer

**3. Date of birth(year):** \_\_\_\_\_

**4. I am...**

- ☐ I year BA student
- ☐ II year BA student
- ☐ III year BA student
- ☐ Other year BA
  
- ☐ I year MSc student
- ☐ II year MSc student
- ☐ Other year MSc

**5. Do you have a full-time or part-time job?**

- ☐ Full-time
- ☐ Part-time
- ☐ No, I have not

**6. Is /(has) anyone in your family (been) an entrepreneur?**

- ☐ Yes
- ☐ No
- ☐ Do not know
- ☐ Do not wish to answer

**7. Family status**

- ☐ Single
- ☐ Married
- ☐ Co-habiting
- ☐ Widowed
- ☐ Separated
- ☐ Divorced

☐ Do not wish to answer

**8. How many relatives do you have** *(Please, fill the box below with the number of your relatives)*

|                       |  |
|-----------------------|--|
| Parents               |  |
| Siblings              |  |
| Children              |  |
| Grandparents          |  |
| Grandchild            |  |
| Cousins               |  |
| Do not wish to answer |  |

**9. How many people are in your family?** *(Please, consider only the family members that are currently living with you)* \_\_\_\_\_

**10. You are**

- ☐ Catholic  
☐ Atheist  
☐ Agnostic  
☐ Other religion: \_\_\_\_\_  
☐ Do not wish to answer

**11. How often do you attend religious services these days?**

- ☐ More than once a week  
☐ Once a week  
☐ Once a month  
☐ Once a year  
☐ Practically never  
☐ Do not wish to answer

**12. Are you currently a voluntary member of an organisation or association?**

- ☐ Yes  
☐ No

**13. If yes, could you please specify the name of the organisation/association?**

\_\_\_\_\_  
\_\_\_\_\_

**14. How would you define your current financial situation?**

- ☐ I live very comfortably  
☐ I live comfortably  
☐ I live in satisfactory conditions  
☐ I can barely afford to live  
☐ It goes bad  
☐ Do not wish to answer

**15. All in all, at the date you can state to be:**

- ☐ Very satisfied  
☐ Satisfied

- ☐ Not really satisfied
- ☐ Not at all satisfied
- ☐ Do not wish to answer

**16. Particularly, how satisfied are you concerning the following aspects:**

|                     | Not at all | A little | Sufficiently | Really | Do not wish to answer |
|---------------------|------------|----------|--------------|--------|-----------------------|
| Health              |            |          |              |        |                       |
| Family relationship |            |          |              |        |                       |
| Friendship          |            |          |              |        |                       |
| Professional life   |            |          |              |        |                       |
| Free time           |            |          |              |        |                       |

**17. Are you familiar with the game theory and prisoner's dilemma?**

- ☐ Yes, I studied it during my university courses
- ☐ Yes, I heard about it but I did not study it
- ☐ I do not know what they are
- ☐ I do not wish to answer

**18. Where would you like to work in 10 years?**

- ☐ In the public administration (social, health or welfare sector)
- ☐ In the public administration (all other sectors)
- ☐ As a freelance
- ☐ In a private enterprise
- ☐ In a non-profit organisation
- ☐ I do not wish to answer

**19. A critical consumer makes consumption choices based on predefined criteria, such as environmental and social sustainability, which have the same importance of price and quality of the products/services.**

Given this definition, please use a scale from 0 to 10 to define your own level of criticality as a consumer, where 0 means you are not a critical consumer and 10 means you definitely are a critical consumer

|   |   |   |   |   |   |   |   |   |   |    |
|---|---|---|---|---|---|---|---|---|---|----|
| 0 | 1 | 2 | 3 | 4 | 5 | 6 | 7 | 8 | 9 | 10 |
|---|---|---|---|---|---|---|---|---|---|----|

**20. Please tell me, in general, how willing or unwilling you are to take risks?**

(Please use a scale from 0 to 10, where 0 means you are “completely unwilling to take risks” and a 10 means you are “very willing to take risks”. You can also use any numbers between 0 and 10 to indicate where you fall on the scale, like 0, 1, 2, 3, 4, 5, 6, 7, 8, 9, 10.)

|   |   |   |   |   |   |   |   |   |   |    |
|---|---|---|---|---|---|---|---|---|---|----|
| 0 | 1 | 2 | 3 | 4 | 5 | 6 | 7 | 8 | 9 | 10 |
|---|---|---|---|---|---|---|---|---|---|----|

**21. How well does the statement describe you as a person “I tend to postpone tasks even if I know it would be better to do them right away”?**

(Please indicate your answer on a scale from 0 to 10, where 0 means “this does not describe me at all” and 10 means “this describes me perfectly”)

|   |   |   |   |   |   |   |   |   |   |    |
|---|---|---|---|---|---|---|---|---|---|----|
| 0 | 1 | 2 | 3 | 4 | 5 | 6 | 7 | 8 | 9 | 10 |
|---|---|---|---|---|---|---|---|---|---|----|

- 22. How well does the statement describe you as a person “As long as I am not convinced otherwise, I always assume that people have only the best intentions”?**  
 (Please indicate your answer on a scale from 0 to 10, where 0 means “this does not describe me at all” and 10 means “this describes me perfectly”)

|   |   |   |   |   |   |   |   |   |   |    |
|---|---|---|---|---|---|---|---|---|---|----|
| 0 | 1 | 2 | 3 | 4 | 5 | 6 | 7 | 8 | 9 | 10 |
|---|---|---|---|---|---|---|---|---|---|----|

- 23. How willing are you to give to good causes without expecting anything in return?**  
 (Please indicate your answer on a scale from 0 to 10, where 0 means you are “completely unwilling to do so” and 10 means you are “very willing to do so”)

|   |   |   |   |   |   |   |   |   |   |    |
|---|---|---|---|---|---|---|---|---|---|----|
| 0 | 1 | 2 | 3 | 4 | 5 | 6 | 7 | 8 | 9 | 10 |
|---|---|---|---|---|---|---|---|---|---|----|

- 24. How would you assess your willingness to return a favour to a stranger?**  
 (Please indicate your answer on a scale from 0 to 10, where 0 means you are “completely unwilling to do so” and 10 means you are “very willing to do so”)

|   |   |   |   |   |   |   |   |   |   |    |
|---|---|---|---|---|---|---|---|---|---|----|
| 0 | 1 | 2 | 3 | 4 | 5 | 6 | 7 | 8 | 9 | 10 |
|---|---|---|---|---|---|---|---|---|---|----|

- 25. How well does the following statement describe you as a person: “if I am treated very unjustly I will take revenge at the first occasion even if there is a cost to do so?”**  
 (Please indicate your answer on a scale from 0 to 10, where 0 means “this does not describe me at all” and 10 means “this describes me perfectly”)

|   |   |   |   |   |   |   |   |   |   |    |
|---|---|---|---|---|---|---|---|---|---|----|
| 0 | 1 | 2 | 3 | 4 | 5 | 6 | 7 | 8 | 9 | 10 |
|---|---|---|---|---|---|---|---|---|---|----|

\*\*\*\*\*

The information collected in this survey will be treated in an anonymous and aggregated manner and used for statistical and research purposes, in accordance to national laws on privacy and data collecting.  
*Thank you for taking the time to complete this questionnaire!*
